# Supplementary material for: Formulation of a Gastroretentive In Situ Oral Gel Containing Metformin HCl Based on DoE
Source: MDPI journal article supplement (doi:10.3390/pharmaceutics14091777), 2022-08-25
Supplement: s1 [file s1]

**Table S1. The floating time for formulation E1**

| Batch No. | lag time (s) | s.d. | relative s.d. (%) | duration |
|-----------|--------------|------|-------------------|----------|
| E1-01     | 48           | 3    | 6                 | > 12 h   |
| E1-02     | 71           | 4    | 5                 | > 12 h   |
| E1-03     | 83           | 12   | 14                | > 12 h   |
| E1-04     | 110          | 6    | 5                 | > 12 h   |
| E1-05     | 54           | 6    | 11                | > 12 h   |
| E1-06     | 57           | 9    | 15                | > 12 h   |
| E1-07     | 59           | 10   | 18                | > 12 h   |
| E1-08     | 50           | 8    | 17                | > 12 h   |
| E1-09     | 52           | 6    | 12                | > 12 h   |

**Table S2. The viscosity of formulation E1**

| Batch No. | Viscosity<br>(mPa·s) | s.d.  | relative s.d. (%) |
|-----------|----------------------|-------|-------------------|
| E1-01     | 304.8                | 2.5   | 0.8               |
| E1-02     | 300.4                | 2.1   | 0.7               |
| E1-03     | 248.6                | 4.8   | 2                 |
| E1-04     | 406.8                | 4.3   | 1.1               |
| E1-05     | 513.6                | 2.4   | 0.5               |
| E1-06     | 548                  | 13.2  | 2.4               |
| E1-07     | 688                  | 229.3 | 33.3              |
| E1-08     | 1318.3               | 9.1   | 0.7               |
| E1-09     | 1283.3               | 24.1  | 1.9               |

**Table S3. The pH values of formulation E1**

| Batch No. | pH   | s.d. |
|-----------|------|------|
| E1-01     | 8.79 | 0    |
| E1-02     | 8.82 | 0.01 |
| E1-03     | 9.2  | 0.01 |
| E1-04     | 9.2  | 0.01 |
| E1-05     | 9.04 | 0    |
| E1-06     | 9    | 0.01 |
| E1-07     | 9.16 | 0.01 |
| E1-08     | 9.16 | 0    |
| E1-09     | 9.17 | 0.01 |

**Table S4. The floating time for formulation E2**

| Batch No. | lag time (s) | s.d. | relative s.d. (%) | duration |
|-----------|--------------|------|-------------------|----------|
| E2-01     | 51           | 12   | 23                | > 12 h   |
| E2-02     | 51           | 9    | 17                | > 12 h   |
| E2-03     | 56           | 10   | 18                | > 12 h   |
| E2-04     | 56           | 7    | 12                | > 12 h   |
| E2-05     | 44           | 2    | 3                 | > 12 h   |
| E2-06     | 67           | 12   | 17                | > 12 h   |
| E2-07     | 75           | 5    | 6                 | > 12 h   |
| E2-08     | 80           | 6    | 7                 | > 12 h   |
| E2-09     | 55           | 10   | 18                | > 12 h   |
| E2-10     | 43           | 8    | 19                | > 12 h   |
| E2-11     | 59           | 4    | 6                 | > 12 h   |
| E2-12     | 46           | 10   | 22                | > 12 h   |
| E2-13     | 70           | 5    | 7                 | > 12 h   |
| E2-14     | 74           | 11   | 15                | > 12 h   |
| E2-15     | 61           | 3    | 4                 | > 12 h   |
| E2-16     | 57           | 3    | 6                 | > 12 h   |
| E2-17     | 62           | 4    | 6                 | > 12 h   |

**Table S5. The viscosity of formulation E2**

| Batch No. | Viscosity<br>(mPa·s) | s.d. | relative s.d. (%) |
|-----------|----------------------|------|-------------------|
| E2-01     | 1721                 | 7    | 0.4               |
| E2-02     | 3960                 | 12   | 0.3               |
| E2-03     | 4320                 | 24   | 0.6               |
| E2-04     | 7888                 | 42   | 0.5               |
| E2-05     | 2448                 | 21   | 0.8               |
| E2-06     | 4472                 | 25   | 0.6               |
| E2-07     | 3624                 | 12   | 0.3               |
| E2-08     | 7388                 | 37   | 0.5               |
| E2-09     | 1715                 | 5    | 0.3               |
| E2-10     | 6400                 | 91   | 1.4               |
| E2-11     | 1669                 | 17   | 1                 |
| E2-12     | 6472                 | 90   | 1.4               |
| E2-13     | 4136                 | 14   | 0.3               |
| E2-14     | 4072                 | 14   | 0.3               |
| E2-15     | 4384                 | 18   | 0.4               |
| E2-16     | 4716                 | 43   | 0.9               |
| E2-17     | 3852                 | 43   | 1.1               |

**Table S6. The pH values of formulation E2**

| Batch No. | pH   | s.d. |
|-----------|------|------|
| E2-01     | 9.16 | 0    |
| E2-02     | 9.08 | 0    |
| E2-03     | 9.06 | 0.01 |
| E2-04     | 9.02 | 0.01 |
| E2-05     | 8.52 | 0.04 |
| E2-06     | 8.8  | 0.04 |
| E2-07     | 8.57 | 0.01 |
| E2-08     | 8.97 | 0.01 |
| E2-09     | 8.85 | 0.01 |
| E2-10     | 8.84 | 0.01 |
| E2-11     | 8.54 | 0.01 |
| E2-12     | 8.73 | 0.01 |
| E2-13     | 8.57 | 0.01 |
| E2-14     | 8.81 | 0.01 |
| E2-15     | 8.52 | 0.01 |
| E2-16     | 8.77 | 0.01 |
| E2-17     | 8.59 | 0.01 |
